# Supplementary material for: National Weather Service Alaska Sea Ice Program: Gridded ice concentration maps for the Alaskan Arctic
Source: Copernicus journal article supplement (doi:10.5194/egusphere-2024-1813), 2024-06-20
Supplement: Supplementary file [file egusphere-2024-1813-AC1-supplement.pdf]

## Review of National Weather Service Alaska Sea Ice Program: Gridded ice concentration maps for the Alaskan Arctic by Pacini, A., et al.

### Summary:

This manuscript introduces gridded sea ice concentration maps available since 2007 from the National Weather Service Alaska Sea Ice Program for the Alaskan Arctic. The main content of the manuscript is the evaluation of this new product (called ASIP henceforth) by means of comparing it with independent data. These are ship-based observations and saildrone images, the MASIE ice extent product and a high-resolution sea ice concentration product. The comparison shown focusses a lot onto so-called parity plots in which the hit and false alarm rates of binary ice information provided and/or derived from the products is compared with each other. Conclusions are drawn from these plots; in addition to these the authors also look a bit into the comparison of the actual sea ice concentration values and take a look at the location of the ice edge and how this intercompares between the different products used.

I am listing a number of general concerns first. Subsequently you find a number of specific comments which in part detail the general concerns further. I also have a few editorial comments / typos.

We thank the reviewer for the thoughtful comments and suggestions, which have strengthened the manuscript. Please find our detailed responses in blue below.

### General Comments:

GC1: I have a major concern with the scientific rationale and motivation to evaluate a product (your product) providing more information than just binary ice / no ice mainly by means of reducing the information content to compare it with evaluation data that (only!) partly also come as binary information. This I really don't understand and find it neither convincingly explained in the manuscript nor do I find compelling evidence in the manuscript that doing the evaluation this way really adds value and provides credible and useful results.

The choice to perform this analysis using a binary ice/no ice framework was made for two main reasons, both underscored by the importance of not propagating large error bars that are present in the datasets utilized. The specific reasons for this choice are explained below and clarified in the text in a new section within the methods section (3.2 Motivation for and conversion to binary ice/no ice).

As written in the text: With the exception of section 4.1.2, our comparisons between ice maps and in situ observations are performed in this binary ice/no ice framework, which we feel is best for two main reasons. First, human observations of SIC are subjective. While Worby and Comiso (2004) quote an uncertainty of 5% - 10% on human-made SIC observations, this is likely an underestimate. As Kern et al. (2019) describe, untrained or less experienced observers will be able to assess SIC at low concentrations (<30%) and at high concentrations (> 80%) relatively easily; however, human observers will naturally struggle in the SIC ranges between these extremes, which is a region of particular interest in this study. Even among experienced

observers, there will be discrepancies in the identified SIC exceeding 10%. Further complication and error is introduced because of constraints on visibility, speed of the ship, distribution of floes and preferential navigation to avoid ice, or to raft to an ice floe, and more. Our second reason for choosing a binary framework has to do with the ranges of SIC provided by ASIP, which are often order 20%. This means that a grid cell reporting 80% could actually exhibit 70% or 90% SIC and still fall in that particular classification range. Additionally, ASIP polygons and ranges are assigned by human observers with variable input data, and thus subjectivity is introduced in the designation of such polygons. When coupled, these two reasons can result in an error range of 40%, almost half of the SIC range.

GC2: The manuscript is not convincing with respect to the description of the steps that are undertaken to i) grid all data into one common grid and to ii) explain how data sets are reduced in their information content from sea ice concentration to binary information - including the associated uncertainty that is involved in this conversion process.

We have updated the text to provide more details on the gridding process, the conversion to binary information, and the associated uncertainty of this conversion in the new Methods section, and in the Data section.

GC3: I am not convinced that the suite of parity plots that is presented are the optimal solution to show the quality of the new data set that you are evaluating in your manuscript. While I believe 1-2 specific parity plots could stay - especially when these are used to compare data that are per se binary, i.e. the saildrone data and MASIE, I very much recommend to work more with 2-dimensional histograms such as the one shown in Figure 6 and work along the lines of computing mean and median differences (also the absolute ones) and their standard deviations. This appears to me a more quantitative way to evaluate the ASIP product in its current form.

As described in the response to GC1, we choose to focus on binary comparisons to be as cautious as possible, given the large uncertainties on percentage-based SIC values. Therefore, we have retained the parity plots but have modified the plots according to the suggestions in GC4. Furthermore, the statistics suggested by the reviewer (e.g. RMSE, mean average difference) are now included in Section 4.1.2.

GC4: In case the parity plots stay as a central element of the manuscript I recommend to reshape them such that they use the space given in the manuscript more efficiently - i.e. decrease the block size but increase the font size.

We have reshaped the parity plots according to the reviewer's suggestions. We have decreased the block sizes and increased the font sizes.

GC5: The Discussion section should be before the Summary section. The discussion section should furthermore discuss in substantially more depth the limitations of the data sets involved - as laid out in my respective specific comment.

We have rearranged the Discussion section as follows: Within the Discussion section, we have added a subsection 5.1 Limitations in the datasets, which is then broken down by the four main

datasets used in this manuscript (in-situ observations, ASIP, AMSR2, and MASIE) and the challenges associated with each dataset are presented.

GC6: I find room for improvement in the structure of the manuscript. I find that data, methodology and results are in part quite mixed and call for a better organization in that respect.

The manuscript has been restructured to have separate Data and Methods sections. The Methods section now details the Parity calculation (3.1), the motivation for and conversion to binary ice/no ice (3.2), how the ice edge is defined (3.3), and acknowledgement of footprint size variations among datasets (3.4). Furthermore, we have carefully edited the manuscript in line with the reviewer's suggestions to move discussions of data to the Data section.

Specific Comments:

L19: "in-situ asset distribution" --> Not immediately clear what you mean with this. What do you mean by "asset" in this context?

We have updated the text to state "in situ observations' geographical distribution".

L56: I suggest to add at least Lavergne et al., 2019, <https://doi.org/10.5194/tc-13-49-2019> to this list since it adds a novel approach. Also, you might want to point towards the Ivanova et al., 2014 10.1109/TGRS.2014.2310136 / 2015 doi:10.5194/tc-9-1797-2015 papers here since these provide a good overview of the different existing approaches.

Thank you for these suggestions. We have included the studies in the text and provided a brief explanation of Ivanova et al. 2014 and 2015. We note that Ivanova et al., 2015 was already cited in that section, but we have elaborated on their analysis.

L64: "synthetic aperture radar" --> There is a growing number of sea ice cover / sea ice concentration products based on SAR data; recent years have seen a boost in such maps thanks to more frequent coverage of the polar regions with SAR images and advanced computational tools. I was wondering whether you should not come up with a few examples of such tools / products for completeness. There is for instance the "MAGIC" tool (see Leigh et al., 2014, 10.1109/TGRS.2013.2290231 ) and there are other products, e.g. DTU\_AI4Arctic.

We have updated the text to include discussion of specific SAR-based products.

L68-70: "Operational ... products." --> I agree only partly to this statement because operational ice charts - at least those of most ice services - use polygons to provide information of groups of dominant ice classes. In addition these only provide ice concentration ranges of, e.g., 10% resolution.

While it is true that operational ice charts provide polygons, we note that these polygons can be smaller than the footprint of some satellites. Furthermore, the text indicates that these operational charts can be higher resolution than passive microwave counterparts, not that they always are.

The text has been updated to clarify this. The point about ice concentration ranges is noted, and we have updated the manuscript to clarify this.

L76: You refer to "many ... techniques used" but you do not further refer to them. Is this on purpose? Because, in what follows you rather report on the results of evaluation studies dealing with two such different products. And in contrast to the CIS sea ice charts the MASIE product is not an operational sea ice product that can be used for navigation but is simply another form of deriving the sea ice extent. I was therefore wondering whether first mentioning a few more "real" ice charts, such as from NIC, AARI, and the Norwegian, Danish and Finish ice services would not make sense.

Thank you for this point. We have updated the text to include a discussion detailing these ice services, including the USNIC, the Danish Meteorological Institute, the Norwegian Meteorological Institute, the Finish Meteorological Institute, the Arctic and Antarctic Research Institute, and the Canadian Ice Service.

I note that it would be helpful to provide the period (i.e. number of years) that were used in the two evaluation studies mentioned.

Done.

L82/83: It might make sense to emphasize that this larger sea ice extent reported for MASIE by Meier et al. (2015) is particularly large / pronounced during summer melt, right?

This is only partially correct; Meier et al. (2015) found that the MASIE sea ice extent exceeded that of passive microwave throughout the year, except for during in May/June and again at the end of melt season/start of freeze-up (Sept/Oct) (see their Figs 2 and 3a). Therefore, we leave the text as-is.

L147-153: Have these maps ever been compared to AARI or NIC charts? If not why not?

ASIP and the NIC use similar methods to generate ice maps and collaborate closely; however, they have independent data streams. To our knowledge, these datasets have not been compared in the scientific literature. This has been added to the text.

L175-177: "Polygons ... a larger polygon." --> This I don't understand ... Does this mean that if there is a large polygon containing 70-90% sea ice concentration within which there is a smaller polygon with 10-30% sea ice concentration will result in the entire area (small + large polygon) to be displayed as 10-30% sea ice concentration? Please modify your writing such that it becomes more clear.

Thank you for pointing out this confusing wording. No, this means that for the spatial extent of the smaller, embedded polygon, the value of that small polygon is used in the gridded polygon. For the area outside the small polygon, the large polygon value is used. The text has been updated to clarify this.

Table 1: There is no SIC value in the last row. Does this mean that a value of 100% is never given - also not for landfast sea ice? This reads a bit strange I have to admit.

Thank you for pointing this out. The last row should have 100% SIC for landfast ice. The table has been updated accordingly.

249-252: While details of the respective data analysis can be found in the Chiodi et al paper I would like to see a more balanced approach (when compared to the ship-based observations) and ask for some basic description about the spatial and temporal resolution of these saildrone data, the observations height and approximate "footprint" and information like this.

We have provided further details on Saildrone imagery, including resolution, height, and footprint in the data section and in the new subsection within the Methods section on footprint size (section 3.4).

L223/224: Worby and Comiso (2004) studied Antarctic sea ice and hence "evaluated" the ASPeCt observations; ASSIST is something which was combined with ASPeCt substantially later, kind of in parallel to the ASPeCt / ASSIST data set that is available, e.g. here: <https://www.cen.uni-hamburg.de/en/icdc/data/cryosphere/seaiceparameter-shipobs.html>

This point is well-taken; we have updated the manuscript to reflect the distinction between ASPeCT and ASSIST/Ice Watch.

L239/240: How is this conversion done? Please give a description here or refer to the place in the paper where the respective information is given.

Done. We now include a section within the Methods section dedicated to "Motivation for and conversion to binary ice/no ice" (Section 3.2).

L241/242: I am not sure the mentioned "subjectivity" is something you need to remove - for two reasons. First of all, also the ice charts contain a certain degree of subjectivity. Secondly, the ASPeCt / ASSIST sea ice observations have a reported uncertainty which is similar to the one you reported in the previous section about the ASIP data set; it is around 5-10%. So the uncertainties are the same and I do not see added value to assess ASIP with binary ice/no-ice values.

See responses to GC1 and GC3.

L260-263: "It utilizes ... stereographic grids" --> This needs to be rewritten. The framing information is:

Thank you for this clarification. We have clarified the text and expanded on the details noted below.

- AMSR2 is a multi-frequency passive microwave sensor that provided brightness temperatures at a number of different frequencies; one of these is 89GHz.

This is now explained in the text (section 2.3.1).

- The ARTIST algorithm has been developed for SSM/I data (Kaleschke et al., 2001), adopted to AMSR-E data (Sprenn et al., 2008) and then applied to AMSR2 data - without further tie point modification as far as I know.

This is now detailed in the text. Tie points are only used when the ASI algorithm is used to convert from brightness temperatures to SIC at 0% and 100% and have not been modified from the AMSR-E tie points (e.g. Beitsch et al., 2014).

Beitsch, A.; Kaleschke, L.; Kern, S. Investigating High-Resolution AMSR2 Sea Ice Concentrations during the February 2013 Fracture Event in the Beaufort Sea. *Remote Sens.* **2014**, *6*, 3841-3856. <https://doi.org/10.3390/rs6053841>

- Sea ice concentration data are derived using the brightness temperature polarization difference of the 89 GHz channels (not from "swath brightness data").

This is now included in the text.

- I invite you to check whether the brightness temperatures aren't first gridded into the polarstereographic grid before the SIC is computed. You might want to check the documentation.

Based on the documentation, gridding is not performed until after SIC is computed. The swath data are converted from brightness temperatures to SIC, and then the gridding is done for daily swath data.

Documentation: <https://data.seaice.uni-bremen.de/amr2/ASIuserguide.pdf>

And as a comment: You use this ASI algorithm SIC data for kind of an "evaluation". While this is of course fine I was wondering whether you can report about any validation studies that report about the accuracy of the AMSR2 SIC product provided by the University of Bremen. How reliable is this data set? It is credible to use this data for an evaluation?

We have now included a discussion of the error estimates on these data, including a brief discussion of studies that have evaluated both the ASI algorithm, and the 3.125 km resolution product, against a variety of data sources to show that these are credible data for the evaluation in this study. This can be found in Section 2.3.1, paragraph 2.

L275: So you regrid the MASIE data but you do not regrid the AMSR2 SIC data? At least you did not comment on that in the previous paragraph.

Thank you for catching this. Both AMSR2 and MASIE are re-gridded for the ice edge intercomparison analysis (section 4.3). The text has been updated to reflect this.

L280-282: Again my question why? Why did you not use the concentration values as provided?

And: How did you do the ice / no ice conversion for these data sets?

Please see the responses to GC1 and GC3.

We have elaborated on the creation of this binary ice/no ice logical for each dataset in the new Methods section 3.1 (Parity analysis) and on the rationale behind a binary ice/no ice framework in the new Methods section 3.2 (Motivation for and conversion to binary ice/no ice).

L294/295: While it is true that historically 15% has been used as the SIC threshold to define where there is ice, I find your approach not well motivated. ASIP provides non-binary observations (see Table 1) and these should be evaluated - not the binary value.

Please see the responses to GC1 and GC3.

We thank the reviewer for raising this concern, as it highlighted that ASIP (now referred to as grASIP based on a comment from reviewer 2) will never report SIC of 15% (Table 1). As such, we re-compute all statistics for a cutoff SIC of 20%: the results are not qualitatively or quantitatively different than when the 15% SIC threshold is used.

In addition, seeing that you included MASIE which uses a 40% threshold to define between ice and no-ice, I get confused about the credibility of your results. This does not look like a well-thought through intercomparison approach, I am sorry.

We note that in this section, grASIP is the only data product considered. Later, when MASIE is considered, the 40% threshold is used to delineate between ice/no ice among all four products (grASIP, AMSR2, MASIE, and in situ observations), not just MASIE, to ensure a credible and appropriate intercomparison.

L296-298: "We note ... with ice" --> I don't understand this sentence.

This means that Sairdron camera images do not give us sea ice concentration, only presence of absence of ice. Here we assume that anytime the Sairdron camera sees ice, then  $SIC > 15\%$  (see Fig 1 of Chiodi et al., 2019). This has been clarified in the text.

L313-319 ... what is given here is essentially a description of the methodology. I suggest to have a more clear structure in the paper, with a Data section, a Methods section and then a Results section.

We have created a new section for Methods, which includes subsections for 3.1 Parity analysis, 3.2 Motivation for and conversion to binary ice/no ice, 3.3 Defining the ice edge, and 3.4 Footprint size. This text explaining the three-way parity calculation has been moved to the Methods section, under 3.1 Parity analysis.

L319-323: This information actually belongs to the section where you described the saildrone observations / data.

This information has been moved to the Data section where the Saildrone data are described (2.2.2 Saildrones).

L327/328: I don't understand how data products (e.g. ASIP or MASIE) can "report" an accuracy. Please re-consider your writing.

We have changed the wording throughout the manuscript to say that data products exhibit a specific accuracy, or that we estimate an accuracy.

L328/330: I don't think it is a credible approach to refer to over- or under-prediction of ice when the respective SIC ranges that you are considering here are as large as 40% or 60%.

What happens to these n=13 or n=12 (Q3) and n=23 (Q2) values if you would change the threshold value of 40% used by 5% or 10%, i.e. the uncertainty of the involved products?

The results are not sensitive to the choice of cutoff threshold. See table R.1 below, which repeats the parity calculation for a cutoff threshold of 30%, 35%, 40%, 45%, and 50%. The pattern is consistent at 40%, 45%, and 50% (ASIP and MASI overpredict ice, AMSR2 underpredicts ice). At 35%, the pattern is true for ASIP (overpredicts ice) and AMSR2 (underpredicts ice), but MASIE is now even (overpredicts and underpredicts at the same rate). At 30%, ASIP now over and under predicts at an even rate, AMSR2 still underpredicts ice, and MASIE underpredicts ice. This is now explained in the text.

|     | Q1         | Q2        | Q3        | Q4            |
|-----|------------|-----------|-----------|---------------|
| 30% | 39, 45, 41 | 8, 27, 10 | 8, 2, 6   | 135, 116, 133 |
| 35% | 41, 50, 43 | 7, 23, 8  | 10, 1, 8  | 132, 116, 131 |
| 40% | 43, 54, 44 | 5, 23, 7  | 13, 2, 12 | 129, 111, 127 |
| 45% | 45, 57, 46 | 6, 21, 5  | 14, 2, 13 | 125, 110, 126 |
| 50% | 47, 62, 47 | 4, 17, 4  | 19, 4, 19 | 120, 107, 120 |

R.1 Matchup counts in the four quadrants, for a range of cutoff thresholds. grASIP is blue, AMSR2 is red, MASIE is yellow.

Figure 5:

- The font size used is quite small.

Fixed.

- It would be helpful to have Q1 to Q4 denoted again in at least one of the panels.

Done.



- In the caption you write "in-situ observation ... (non-binary)". I am confused ... so here you binned the ice products but not the evaluation data? Why? This is inconsistent.

Sorry that this was not clear. As described in section 4.1.4, it is imperative to perform a consistent comparison among the datasets. Since MASIE has an inherent cutoff threshold of 40%, to compare it with grASIP, AMSR2, and the in situ observations, these datasets must also be cutoff at 40%. Therefore, for all four datasets (grASIP, AMSR2, MASIE, and in situ observations) when  $SIC < 40\%$  it is considered as having no ice, while when  $SIC \geq 40\%$  it is considered as having ice. To do this calculation, we need in situ observations that provide SIC, and thus we exclude the binary in situ observations from this comparison. This has been clarified in the text and figure caption.

L341/342: "but at this point framework" --> Why? I doubt that this is a useful comparison and that it provides a credible result.

Please see the responses to GC1 and GC3.

L348: "binned at ..." --> To me this looks as if this would result in 11 bins but Figure 6 contains 12 bins at both the x and the y-axis. Also the annotation with 10, 20, 30 ... does not fit well with the respective bin boundaries of 5, 15, 25, 35, 45% et cetera. Please check and if need be correct.

Thank you for noting this. There was an issue with our inclusive lower and upper bounds. The figure, methodology, and text, have been updated. Now data are binned at 10% resolution throughout all concentration intervals.

L353-359: "Subsequently ... by AMSR2" --> I don't think that this step, particularly in this oversimplified fashion, adds value to what is shown in Fig. 6. I suggest you compute the overall difference and its standard deviation (or the RMSE) and to also compute the mean absolute difference. Both you can report in a separate table or in the text.

Thank you for this suggestion, we have updated the text to include this calculation. Note that the simplified version that we presented was the mean absolute difference, without normalization. The results of both the RMSE and the mean absolute difference (MAD) are presented in Table 4. Note that this calculation can be repeated: once for just the averages (i.e. the squares) and once for all the data points that go into Fig 6, which essentially represents the weighted RMSE and MAD. The final column represents the RMSE and MAD calculations just for the MIZ (20% – 80%).

L370+ / Figure 7: I don't find this additional parity plot useful. The information one can take from this figure one can as well simply take from Figure 6.

Respectfully, we disagree as to the use of this parity plot. This figure highlights the data available in the MIZ, and the resultant accuracy rate for grASIP and AMSR2 in this region. While this information is included in Fig. 6, it would be challenging to diagnose the exact accuracy in the MIZ from Fig. 6. Specifically, the 36/30 split for ice/no ice for grASIP and the 17/49 split for ice/no ice for AMSR2 is not quantifiable in Fig. 6; one can see that generally,

grASIP has more matchups above the one-to-one line and AMSR2 has more matchup below the one-to-one line in Fig. 6, but it is not possible to quantify how many correct matchups are present in each of these datasets from Fig. 6. Therefore, we have chosen to keep Fig. 7.

L404: "where the products most strongly disagree" --> Which you could again nicely derive from Fig. 6 by computing the mean SIC difference and the mean absolute SIC difference using the in-situ SIC range of 15-80%.

Thank you for this suggestion. This is now included in Table 4 and referenced in the text.

L406: I don't understand what this "accuracy rate" is. Are you computing the SIC difference? Possibly not because you seem to refer to the ice edge only. So what are you looking at here? The accuracy of which geophysical parameter? And why "rate"

No, we are computing how many match-ups in each bin are correct, and how many are incorrect. In other words, for each range of distances from the ice edge (e.g. 25 km – 50 km from the ice edge, in the ice), we ask how many times the product and in-situ asset agree that ice is present, and how many times they do not. This then provides an accuracy for that given distance bin. The calculation is repeated for each distance bin (e.g. 50 km – 75 km, 75 km – 100 km, etc.) and for each product (grASIP, AMSR2, and MASIE). This results in a binned accuracy as a function of distance from the ice edge. Please note that given the confusion around this figure, we have removed it from the text, as the results from the figure are shown similar in Tables 3 and 4.

L410-413: Sorry, but I don't understand what you did here. I see an accuracy rate given in percent at the y-axis (in %) but I don't know of which parameter and I see a distance from the ice edge in km (possibly the center of the grid cells are taken - even though I recall that you were reprojecting data onto a 0.05 degree grid ...). But what do the curves tell me?

We apologize for the confusion; given that this figure has confused multiple readers, and given that the results it presents are similar to those provided by the parity analysis, we have decided to simplify the text by removing the figure and the discussion.

For the reviewer's reference, we did the following (now excluded from the manuscript).

1. We want to know how accurate each product is at recognizing the presence or absence of ice as a function of distance to the ice edge.
2. To do this we compute the distance of an in-situ asset to the ice edge in ASIP, in AMSR2, and in MASIE. Therefore, now each in-situ asset has three distances: a distance to the ASIP ice edge, a distance to the AMSR2 ice edge, and a distance to the MASIE ice edge.
3. Then, for each product, we perform the following analysis.
  - a. For each 25 km bin defined by distance to the ice edge (e.g. for the 25 km – 50 km range into the ice, or the 50 km – 75 km range into open water), we find all available in-situ assets that fall in that distance range.
  - b. Of those in-situ assets, we compute how often the product is correct about the presence or absence of ice for that in-situ asset.

- i. So for example, if we had 10 in-situ assets that were between 25 km and 50 km of the ASIP ice edge in the ice, and ASIP reported 8 of these grid cells as having ice, then the 25 km – 50 km bin would have an accuracy rate of 80%.
4. Once this calculation is done for each product, and for each distance bin, we can plot the curves as shown in the original Fig. 9, which allows us to assess the accuracy of a product at determining the presence/absence of ice as a function of distance to that product's ice edge.

L422/423: I don't understand the purpose of this 3x3 pixel window smoothing. Why do you want to remove small-scale features? What is the motivation / scientific rationale behind this step?

We use 3 x 3 pixel window smoothing to remove small-scale features in order to do a large-scale/basin-wide intercomparison between ice edges. We now explain this in the text.

L423-426: Please check the scientific literature with respect to the ice edge delineation as carried out by you. There should be several papers published that have done this (e.g. Cortenay Strong et al. "On the definition of marginal ice zone width", Journal of Atmospheric and Oceanic Technology, 34, 2017). You might want to check whether your idea is similar to their's and cite and/or check the existing literature for more examples to back up your approach better.

We have now added a paragraph describing a variety of methodologies used to define the MIZ (e.g. Strong et al., 2017; Strong and Rigor, 2013; Strong, 2012; Stroeve et al., 2016). We originally implemented a similar technique to the radial technique used by Stroeve et al. (2016), but thanks to the reviewer's comment we have simplified our approach to rely solely on the Stroeve et al. (2016) technique, as it is a more intuitive method than our original algorithm.

L450/451++: "This is likely ..." --> maybe yes, but not necessarily because at the ice concentration ranges (around 15% and around 40%) you are considering here, the melt pond fraction on the sea ice should be rather small because ice floes have disintegrated and quite some amount of the ice encountered might be brash ice.

Thank you for this comment. We note that here we were referring to snow and melt on the surface of ice as well as melt ponds. We have tidied-up the language to state that "melt ponds and snow and melt on the surface of the ice" instead of "melt water" could be causing a challenge for passive microwave measurements at low concentrations in summer.

I invite the authors to check the available literature about other possibilities to explain the observed discrepancies. There has been a study about why MASIE shows ice while other products don't, for instance.

Meier et al. (2015) compare passive microwave products with MASIE, and they demonstrate a similar result (but for sea ice extent (area) instead of distance). They attribute the discrepancy between MASIE and passive microwave, especially in summer months, as potentially due to 1) melt water on the surface of ice, which would result in an under-estimation of ice by passive microwave, 2) the presence of new, thin ice, which would result in an under-estimation of ice by

passive microwave, 3) the presence of new, thin ice that could be hard to distinguish for MASIE analysts, leading to an over-estimation of ice by MASIE, 4) the lack of clear imagery, that could make an analyst reluctant to shift the ice edge until a new image is available, which would result in an over-estimation of ice by MASIE, and 5) the higher-resolution nature of MASIE, which would result in an over-estimation of ice by passive microwave (since it would struggle to see openings in the ice near the coast). A discussion of this has now been included in the text.

In general, what should follow here is a discussion into the direction of the credibility of the approaches compared. Influencing factors are the grid resolution and/or the resolution of the input data. This applies to ASIP, MASIE and AMSR2-ASI. Please carefully check how ASI treats potential spurious ice along the ice edge due to the elevated weather effect one has to deal with at 89 GHz. If I am not mistaken, then the ASI algorithm is actually kind of a hybrid product where "bad" sea ice is filtered away by using other, coarser resolution SIC data.

A detailed discussion of potential sources of error and data limitations has been added to the text. Furthermore, a comparison of footprint sizes among data sets is presented in the new Methods section (3.4 Footprint size).

Thank you for your comment. We have added a brief discussion on algorithms to section 2.3.1. However, a detailed description of the ASI algorithm is outside the scope of this paper and we reference the reader to Melsheimer, 2024.

Melsheimer, C.: ASI Version 5 Sea Ice Concentration User Guide, <https://data.seaice.uni-bremen.de/amr2/ASIuserguide.pdf>, 2024.

To respond to the reviewer's question: that is correct, ASI uses the lower frequency channels (with lower resolution; 18, 23, 37 GHz) to mitigate the increased weather effects due to the higher frequency 89 GHz channel through a series of filters that use gradient ratios between channels. Additionally, ASI uses the Bootstrap algorithm to set ASI SIC to 0% when Bootstrap SIC is less than 5%, as Bootstrap does not have as many problems as ASI with atmospheric processes, as it uses lower-resolution frequency channels (18 and 37 GHz).

Another issue you might want to discuss is the tendency for ice analysts to, as a first guess, take the conditions of the previous day - especially if there are not enough (high-resolution) satellite data of the day in question at hand. How often is the information given in the ASIP or MASIE product actually based on coarse resolution satellite data from passive microwave sensors (e.g. 25 km)?

We have added a discussion of this phenomenon to the text. Although we cannot quantify how often the information in ASIP and MASIE comes from passive microwave (e.g. 25 km resolution), we note that Meier et al. (2015) document an example where the MASIE ice edge did not change despite passive microwave changing. Similarly, Steele and Ermold (2015) show that the MASIE ice edge is more prone to loitering, or remaining in the same geographical location for multiple days in a row, when compared to a passive microwave ice edge. Both these examples would suggest that it is not often that analysts use only passive microwave to draw the ice edge. This has been added to the text.

Another issue not touched by you is the fact that ASIP uses polygons and that you are dealing with a sea ice concentration range. Neither the location and extent of the polygon nor the sea ice concentration range in these are overly well defined or FAIR in the sense that repeated analysis would result in exactly the same result; it is not transparent.

We agree that the manual analysis and range of SIC values in each polygon introduce sources of errors, as discussed in the new section 3.2 (Motivation for and conversion to binary ice/no ice). Specifically, given that polygon shapes are chosen by the analyst, and that polygons only exhibit concentration ranges, and not specific SIC values, this motivated our choice to retain a binary ice/no ice framework, instead of computing accuracy estimates as a function of SIC (see response to GC1 and GC3).

Finally, how much are ASIP maps generated in the sense to provide maximum safety for navigation and therefore - similarly to the various ice charts available - come up with a rather conservative estimate, likely tending to overestimate the true ice conditions for the sake of maritime safety?

ASIP ice analysts do not have this directive. Of course, implicit bias could result in a tendency to overestimate the true ice conditions if an analyst errs on the side of caution, but this is not a stated edict at ASIP. This has been described in the text.

L485-486: "Since the ... " --> Ok, but how much "hand-waving" is involved into drawing the polygons' boundaries in comparison to a well-defined 3.125 km gridded SIC product as provided from AMSR2 using ASI?

This is a good point and the statement has been removed.

L488/489: "...where they have been observed" --> exactly. So what is with, e.g., the next day, when there is no high-resolution information available but only a AMSR2 6 GHz 50 km footprint-based SST estimate because there are clouds? Such a day-to-day heterogeneity is not helpful and combining different spatial scales of information requires particular care when it comes to assess uncertainties. I am pretty sure that the ASIP and to some degree also the MASIE product stitch different scale-observations together and the credibility of the data product can change quickly from one pixel to the next and from one day to the next.

Thank you for your comment; as this is outside the scope of the paper, the sentence has been removed.

L491: See my earlier comment about the work Worby and Comiso did. It is the Antarctic and it is ASPeCt. You must not use it to refer to ASSIST.

Thank you for catching this. We have updated the text accordingly.

L491/492: "recall that ... at that time" --> While this is true, the ship is moving during the 10-minute observation time, hence elongating the observed area towards an elliptically shaped

region centered along the ship's track. In addition, if I am not mistaken, you did not compare single ASSIST observations but looked into daily averages?!?

That is correct, and we have added a sentence to the text to state that the ship could be moving during the 10-minute sampling window, thus increasing the area covered slightly. We looked into daily averages, as is detailed later in the paragraph, but it is worth noting the limitations on individual measurements before considering the limitations of the daily averages. Systemic biases in the individual observations will then feed back onto the daily averages.

L492-502: All true and possibly also discussed to some extent in Kern et al. (2019), right?

Thank you for noting this, some (but not all) of these points are discussed in Kern et al. (2019) and Bietsch et al. (2015). The citations have been added to the text.

L503-511: What I would strongly recommend is to suggest further evaluation of ASIP with independent observations of the sea ice conditions from Sentinel satellites (Sentinel-1 SAR and Sentinel-2 MSI). These provide a spatial representation of the conditions at the ice edge / in the MIZ and potentially would be a more solid basis for any further evaluation.

The suggested analysis is an interesting extension of the work, and would be an interesting study, but is outside the scope of this paper. We have now included a sentence in the Discussion section indicating that additional validation using SAR might be useful.

Editorial Comments / Typos:

L60: "Steffan" needs to be "Steffen"

Fixed.

L64: "imagery" --> "imagers"

Fixed.

Figure 1: I suggest to increase the size of the panels a bit to enhance readability. Alternatively, increasing the font size would help as well.

Done. We moved panel (e) below panels a-d, and we moved the details on the AMSR2 ice concentration binning into the body of the text, per reviewer 2's request.

L130: I guess this was August 21 and not August 12? Where was the image taken? Could you indicate that in one of the maps?

No, the image was taken on August 12. The Wave Gliders themselves did not have image capability, so the image was taken from the RV Ukpik during deployment. We chose to show ice maps on August 21 in order to show the tracks one week before and one week after an ice map,

to demonstrate the persistence of the ice tongue discussed in the text. This has been clarified in the text.

L221: As far as I know the two Kern et al. papers are dealing with both the Antarctic and the Arctic - especially the one from 2020.

Thank you, the text has been updated to state this explicitly.

Table 3: The way to specify inclusivity in values ranges would be [15% to 80%] or [0-40%[ or ]80 to 100%]

Thank you, the table has been updated accordingly (using the bracket vs. parenthetical notation for closed vs. open intervals).

L345: "double triple" --> typo

Fixed.

Figure 6:

Fonts at the legend should be larger.

There is no legend, but font size was increased for the full figure.

I suggest to change "% of time" to "count"

Thank you for the suggestion. We retain % of time, as the term "count" does not accurately represent the shading.

I also suggest to write "sea ice concentration" instead of just "ice" when denoting the axes.

Done.

Figure 8:

Please increase the font sizes.

Done.

Figure 10: Please provide the unit of the distances.

Done.
